# Supplementary material
Source: publisher site journal article supplement (https://www.dovepress.com/article/558621)
Supplement: Supplementary file 1 [file 558621%20Supplementary%20materials.docx]

**Supplementary materials**

Supplementary Table S1. The EAPC of edentulous YLDs rates in women of different age groups from 2002 to 2021

| Age | EAPC (95% CI) | | |
| --- | --- | --- | --- |
| China | United States | Global |
| 20-24 years | 1.056 (0.227, 1.893) | 1.339 (-0.049, 2.747) | 0.041 (-1.778, 1.893) |
| 25-29 years | 1.217 (0.152, 2.293) | 1.200 (-0.325, 2.749) | 0.149 (-1.38, 1.703) |
| 30-34 years | 1.101 (-0.224, 2.443) | 1.039 (-0.412, 2.512) | 0.550 (-0.798, 1.916) |
| 35-39 years | 0.934 (-0.542, 2.431) | 0.940 (-0.278, 2.174) | 0.811 (-0.027, 1.657) |
| 40-44 years | 0.615 (-0.784, 2.033) | 0.894 (-0.155, 1.954) | 0.209 (-0.094, 0.513) |
| 45-49 years | 0.449 (-0.651, 1.560) | 0.878 (-0.243, 2.011) | -0.290 (-0.542, -0.038) |
| 50-54 years | 0.447 (-0.372, 1.274) | 0.832 (-0.419, 2.099) | -0.233 (-0.407, -0.058) |
| 55-59 years | 0.528 (-0.256, 1.317) | 0.742 (-0.546, 2.047) | 0.005 (-0.141, 0.151) |
| 60-64 years | 0.603 (-0.317, 1.531) | 0.665 (-0.553, 1.897) | 0.004 (-0.313, 0.322) |
| 65-69 years | 0.585 (-0.438, 1.620) | 0.626 (-0.464, 1.727) | -0.170 (-0.512, 0.174) |
| 70-74 years | 0.458 (-0.487, 1.412) | 0.702 (-0.241, 1.655) | -0.373 (-0.724, -0.022) |
| 75-79 years | 0.288 (-0.476, 1.057) | 0.852 (0.014, 1.697) | -0.513 (-0.74, -0.286) |
| 80-84 years | 0.075 (-0.510, 0.665) | 0.960 (0.173, 1.755) | -0.390(-0.603, -0.175) |
| 85-89 years | -0.097 (-0.574, 0.381) | 0.963 (0.207, 1.724) | -0.263 (-0.433, -0.093) |
| 90-94 years | -0.217 (-0.656, 0.223) | 0.899 (0.190, 1.614) | -0.258 (-0.449, -0.067) |
| 95+ years | -0.335 (-0.741, 0.073) | 0.837 (0.176, 1.502) | -0.224 (-0.391, -0.057) |

Abbreviations: EAPC, estimated average percentage change; YLDs, years lived with disability

In interpreting EAPC results, only values with 95% CI not crossing zero were considered statistically significant.
